# Supplementary material
Source: HighWire-hosted journal article supplement (https://bmjopen.bmj.com/content/11/9/e050819)
Supplement: inline-supplementary-material-2 [file inline-supplementary-material-2.pdf]

## Appendix 2: MEDLINE (Ovid) search terms

1. exp Vision Tests/is [Instrumentation]
2. (vision or visual or eye).ab,kf,ti.
3. (test\* or assess\* or screen\* or check\*).ab,kf,ti.
4. (technolog\* or techniqu\* or tool\* or system\* or instrument\* or automat\* or screener or photoscreen\* or "auto-refract\*" or "autorefractor" or "table-top" or "hand held" or "hand-held" or "handheld" or device\* or portable or smartphone\* or computer\* or "computer-based" or software or mobile\* or web or app or application or "machine learning" or "computer vision" or "image processing" or "eye-track\*" or "eye track\*" or portable\* or "virtual reality" or simulat\* or tablet\* or "head mounted" or head-mounted).ab,kf,ti.
5. ((vision or visual or eye) adj2 (test\* or assess\* or screen\* or check\*)).ab,kf,ti.
6. ((vision or visual or eye) adj2 (test\* or assess\* or screen\* or check\*) adj20 (technolog\* or techniqu\* or tool\* or system\* or instrument\* or automat\* or screener or photoscreen\* or "auto refractor" or "autorefractor" or "table-top" or "hand held" or device\* or smartphone\* or computer\* or software or mobile\* or web or app or application or "machine learning" or "computer vision" or "image processing" or "eye-track\*" or "eye track\*" or portable\* or "virtual reality" or simulat\* or tablet\* or "head mounted" or head-mounted)).ab,kf,ti.
7. "teleophthalmolog\*".ab,kf,ti.
8. 1 or 6 or 7
