# Supplementary material
Source: HighWire-hosted journal article supplement (https://bmjopen.bmj.com/content/11/9/e050819)
Supplement: inline-supplementary-material-3 [file inline-supplementary-material-3.pdf]

## Appendix 3: Search strategy for grey literature

### 1. Web search engines

| Website                                                                                     | Keywords                                                                                                                                                                                    |
|---------------------------------------------------------------------------------------------|---------------------------------------------------------------------------------------------------------------------------------------------------------------------------------------------|
| <a href="https://www.google.com/advanced_search">https://www.google.com/advanced_search</a> | "Vision Screening" OR "Vision tests" OR "eye examination" -adults -impairments -old -youtube -severe -mental -blind -blindness -cognitive -hearing -disorder -disorders -glaucoma -diabetic |

We will use the incognito window of the browser to reduce personalization bias in the grey literature search. Search engines such as Google may give us infinite numbers of results while searching for grey literature; therefore, we will consider only the first 50 pages of the result.

### 2. Thesis and dissertation

| Website                                                                                                 | Keywords                                                                                          |
|---------------------------------------------------------------------------------------------------------|---------------------------------------------------------------------------------------------------|
| <a href="https://oatd.org/">https://oatd.org/</a>                                                       | ((vision screening) OR (vision assessment) OR (vision tests) OR (eye examination) AND (children)) |
| <a href="https://about.proquest.com/en/dissertations/">https://about.proquest.com/en/dissertations/</a> |                                                                                                   |

The search results will be limited to Doctoral theses/dissertations.

### 3. Clinical trials

| Website                                                                                                   | Keywords                                                                                                                                              |
|-----------------------------------------------------------------------------------------------------------|-------------------------------------------------------------------------------------------------------------------------------------------------------|
| <a href="https://clinicaltrials.gov/ct2/home">https://clinicaltrials.gov/ct2/home</a>                     | ((vision screening) OR (vision assessment) OR (vision tests) OR (eye check) OR (eye examination) AND (children))   18 years, Child   Phase 1, 2, 3, 4 |
| <a href="https://www.mayo.edu/research/clinical-trials">https://www.mayo.edu/research/clinical-trials</a> | Vision screening OR Vision Tests                                                                                                                      |

### 4. Patents

| Website                                                                       | Keywords                                                         |
|-------------------------------------------------------------------------------|------------------------------------------------------------------|
| <a href="https://www.epo.org/">https://www.epo.org/</a>                       | vision screening OR vision tests OR eye examination AND children |
| <a href="https://www.uspto.gov/">https://www.uspto.gov/</a>                   |                                                                  |
| <a href="https://www.ipaustralia.gov.au/">https://www.ipaustralia.gov.au/</a> |                                                                  |
| <a href="https://rospatent.gov.ru/">https://rospatent.gov.ru/</a>             |                                                                  |

### 5. Data Sets

| Website                                                                           | Keywords                                                                         |
|-----------------------------------------------------------------------------------|----------------------------------------------------------------------------------|
| <a href="https://easy.dans.knaw.nl/ui/home">https://easy.dans.knaw.nl/ui/home</a> | "vision screening" OR "vision assessment" OR "Vision tests" OR "eye examination" |

## 6. Guidelines

| Website Name                                                    | URL                                                                                       |
|-----------------------------------------------------------------|-------------------------------------------------------------------------------------------|
| American Association for Pediatric Ophthalmology and Strabismus | <a href="https://aapos.org/home">https://aapos.org/home</a>                               |
| American Academy of Ophthalmology                               | <a href="https://www.aao.org/">https://www.aao.org/</a>                                   |
| Vision Aware                                                    | <a href="https://visionaware.org/">https://visionaware.org/</a>                           |
| American Academy of Optometry                                   | <a href="https://www.aaopt.org/">https://www.aaopt.org/</a>                               |
| World Council of Optometry                                      | <a href="https://worldcouncilofoptometry.info/">https://worldcouncilofoptometry.info/</a> |
| European Council of Optometry and Optics                        | <a href="https://www.ecoo.info/">https://www.ecoo.info/</a>                               |
| General Optical Council (UK)                                    | <a href="https://www.optical.org/">https://www.optical.org/</a>                           |
| Optometry Australia                                             | <a href="https://www.optometry.org.au/">https://www.optometry.org.au/</a>                 |
| Australian Society of Ophthalmologists                          | <a href="https://asoeye.org/">https://asoeye.org/</a>                                     |
| NICE – National Institute for Health and Care Excellence        | <a href="https://www.nice.org.uk/guidance/">https://www.nice.org.uk/guidance/</a>         |

## 7. Gov. reports/white papers/

| Website Name        | URL                                                               |
|---------------------|-------------------------------------------------------------------|
| EUScreen            | <a href="https://www.euscreen.org/">https://www.euscreen.org/</a> |
| WHO                 | <a href="http://www.who.int/">http://www.who.int/</a>             |
| GOV.UK              | <a href="https://www.gov.uk/">https://www.gov.uk/</a>             |
| EU research results | <a href="https://cordis.europa.eu/">https://cordis.europa.eu/</a> |

## 8. Protocols

| Website Name           | URL                                                                                     |
|------------------------|-----------------------------------------------------------------------------------------|
| Prospero               | <a href="https://www.crd.york.ac.uk/PROSPERO/">https://www.crd.york.ac.uk/PROSPERO/</a> |
| BMJ Open               | <a href="https://bmjopen.bmj.com/">https://bmjopen.bmj.com/</a>                         |
| Open Science Framework | <a href="https://osf.io/">https://osf.io/</a>                                           |
